# Supplementary material for: Towards core outcome set (COS) development: a follow-up descriptive survey of outcomes in Cochrane reviews
Source: PubMed Central journal article supplement (PMC4489040; doi:10.1186/s13643-015-0060-0), 2015-05-19
Supplement: 13643_2015_60_MOESM1_ESM.pdf [file 13643_2015_60_MOESM1_ESM.pdf]

**Additional file 1:** Consistency of outcomes specified in 2013 Cochrane Reviews compared to 2007 and 2011 Cochrane Reviews

| <b>Review Group<br/>(n=number of<br/>reviews in CRG<br/>after excluding<br/>diagnostic<br/>studies, reviews<br/>of reviews)</b> | <b>Outcomes that were specified ≥50% of<br/>Reviews</b>                                                                                             | <b>Number of 2013<br/>reviews specifying<br/>the outcome (%)</b> |
|---------------------------------------------------------------------------------------------------------------------------------|-----------------------------------------------------------------------------------------------------------------------------------------------------|------------------------------------------------------------------|
| Acute Respiratory Group (n=6)                                                                                                   | Adverse events/effects * ~<br>Mortality (all-cause)<br>Costs                                                                                        | 4 (67%)<br>4 (67%)<br>3 (50%)                                    |
| Airways (n=19)                                                                                                                  | Adverse events/effects * ~<br>Symptom severity/control * ~<br>Lung function * ~<br>Exacerbations * ~<br>Quality of Life (generic and/or specific) ~ | 11 (58%)<br>11 (58%)<br>12 (63%)<br>12 (63%)<br>14 (74%)         |
| Anaesthesia (n=17)                                                                                                              | Mortality *                                                                                                                                         | 13 (76%)                                                         |
| Back (n=2)                                                                                                                      | <i>Only 2 reviews published in 2013, hence all outcomes are present in ≥50% of reviews.</i>                                                         |                                                                  |
| Bone, Joint & Muscle trauma (n=10)                                                                                              | Adverse events/effects ~<br>Pain * ~<br>Function/disability *<br>Return to work/former activities ~                                                 | 6 (50%)<br>7 (58%)<br>9 (75%)<br>8 (67%)                         |
| Breast Cancer (n=4)                                                                                                             | Adverse event/effects *<br>Incidence of seroma<br>Volume of seroma aspirations<br>Quality of Life (generic) *                                       | 2 (50%)<br>2 (50%)<br>2 (50%)<br>3 (75%)                         |
| <i>Childhood Cancer (n=5)</i>                                                                                                   | Adverse events/effects                                                                                                                              | 3 (60%)                                                          |
| Colorectal Cancer (n=3)                                                                                                         | Complications (intervention related)<br>Mortality (all cause)                                                                                       | 2 (67%)<br>2 (67%)                                               |
| Consumer & Communication (n=6)                                                                                                  | Adverse events/effects<br>Knowledge/understanding ~<br>Organisational outcomes                                                                      | 4 (67%)<br>5 (83%)<br>6 (100%)                                   |
| Cystic Fibrosis & Genetic Disorders (n=12)                                                                                      | Adverse events/effects * ~<br>Lung function<br>Nutritional status/anthropometry                                                                     | 11 (92%)<br>8 (67%)<br>6 (50%)                                   |
| Dementia & Cognitive Improvement (n=3)                                                                                          | Adverse events/effects * ~<br>Mortality (all cause)<br>Global function * ~<br>Cognitive function<br>Quality of Life (generic) * ~                   | 3 (100%)<br>3 (100%)<br>2 (67%)<br>2 (67%)<br>2 (67%)            |
| Depression, Anxiety & Neurosis (n=8)                                                                                            | Adverse events/effects ~<br>Treatment response/efficacy<br>Quality of Life (generic) * ~<br>Treatment acceptability (drop-out) *                    | 5 (63%)<br>4 (50%)<br>5 (63%)<br>4 (50%)                         |
| Development. Psychosocial & learning problems (n=8)                                                                             | Adverse events/effects ~                                                                                                                            | 5 (63%)                                                          |
| Drugs & alcohol (n=7)                                                                                                           | Adverse events/effects<br>Mortality (all cause)<br>Drug use * ~                                                                                     | 5 (72%)<br>4 (57%)<br>6 (86%)                                    |
| Ear, Nose & Throat Disorders (n=2)                                                                                              | <i>Only 2 reviews published in 2013, hence all outcomes are present in ≥50% of reviews.</i>                                                         |                                                                  |

|                                                          |                                                                                             |          |
|----------------------------------------------------------|---------------------------------------------------------------------------------------------|----------|
| <i>Effective Practice and organisation of care (n=7)</i> | Adverse events/effects                                                                      | 4 (57%)  |
|                                                          | Costs                                                                                       | 4 (57%)  |
| Epilepsy (n=6)                                           | Adverse events/effects ~                                                                    | 6 (100%) |
|                                                          | Seizure reduction (≥50%) * ~                                                                | 3 (50%)  |
|                                                          | Seizure free *                                                                              | 5 (84%)  |
|                                                          | Quality of Life (generic) *                                                                 | 4 (67%)  |
|                                                          | Withdrawals ~                                                                               | 4 (67%)  |
| Eyes & Vision (n=10)                                     | Adverse events/effects * ~                                                                  | 6 (60%)  |
|                                                          | Visual acuity * ~                                                                           | 8 (80%)  |
|                                                          | Quality of Life (generic) * ~                                                               | 6 (60%)  |
| Fertility Regulation (n=2)                               | <i>Only 2 reviews published in 2013, hence all outcomes are present in ≥50% of reviews.</i> |          |
| Gynaecological Cancer (n=17)                             | Adverse events/effects                                                                      | 12 (67%) |
|                                                          | Overall Survival ~                                                                          | 12 (67%) |
|                                                          | Progression/disease-free survival ~                                                         | 10 (56%) |
| Haematological Malignancies (n=6)                        | Adverse events/effects ~                                                                    | 6 (100%) |
|                                                          | Mortality (all cause) ~                                                                     | 4 (67%)  |
|                                                          | Overall Survival ~                                                                          | 3 (50%)  |
|                                                          | Progression/disease-free survival                                                           | 3 (50%)  |
|                                                          | Mortality (intervention-related)                                                            | 3 (50%)  |
|                                                          | Response rate                                                                               | 4 (67%)  |
|                                                          | Quality of Life (generic)                                                                   | 3 (50%)  |
| Heart (n=17)                                             | Adverse events/effects ~                                                                    | 12 (71%) |
|                                                          | Mortality (all cause) * ~                                                                   | 10 (59%) |
|                                                          | Quality of Life (generic) ~                                                                 | 10 (59%) |
|                                                          | Costs                                                                                       | 11 (65%) |
| Hepato-Biliary (n=11)                                    | Adverse events/effects * ~                                                                  | 10 (91%) |
|                                                          | Mortality (all cause) * ~                                                                   | 10 (91%) |
|                                                          | Quality of Life (generic) * ~                                                               | 10 (91%) |
| HIV/AIDS (n=10)                                          | Adverse events/effects ~                                                                    | 9 (90%)  |
|                                                          | Mortality (all cause)                                                                       | 7 (70%)  |
| Hypertension (n=2)                                       | <i>Only 2 reviews published in 2013, hence all outcomes are present in ≥50% of reviews.</i> |          |
| Incontinence (n=4)                                       | Adverse events/effect * ~                                                                   | 4 (100%) |
|                                                          | Urinary incontinence (subjective) * ~                                                       | 3 (75%)  |
|                                                          | Urinary incontinence (clinician observation)                                                | 2 (50%)  |
|                                                          | Incontinence episodes                                                                       | 3 (75%)  |
|                                                          | Pad changes                                                                                 | 3 (75%)  |
|                                                          | Pad test                                                                                    | 4 (100%) |
|                                                          | Urodynamic measures * ~                                                                     | 2 (50%)  |
|                                                          | Pelvic floor muscle function/strength                                                       | 2 (50%)  |
|                                                          | Incontinence improvement (subjective)                                                       | 2 (50%)  |
|                                                          | Quality of Life (generic) * ~                                                               | 2 (50%)  |
|                                                          | Quality of Life (specific) * ~                                                              | 2 (50%)  |
|                                                          | Quality of Life (generic or specific)                                                       | 3 (75%)  |
| Infectious Diseases (n=9)                                | Adverse events/effects * ~                                                                  | 5 (50%)  |
|                                                          | Mortality (all cause)                                                                       | 6 (50%)  |
| IBD & Function Bowel Disorders (n=2)                     | <i>Only 2 reviews published in 2013, hence all outcomes are present in ≥50% of reviews.</i> |          |
| Injuries (n=11)                                          | Mortality (all cause) ~                                                                     | 8 (73%)  |
| Lung Cancer (n=2)                                        | <i>Only 2 reviews published in 2013, hence all outcomes are present in ≥50% of reviews.</i> |          |
| Menstrual Disorders & subfertility (n=16)                | Adverse events/effects * ~                                                                  | 9 (53%)  |
|                                                          | Live births ~                                                                               | 9 (53%)  |

|                                               |                                                                                                                                                                                                                          |                                                                                                   |
|-----------------------------------------------|--------------------------------------------------------------------------------------------------------------------------------------------------------------------------------------------------------------------------|---------------------------------------------------------------------------------------------------|
| Metabolic & Endocrine Disorders (n=7)         | Adverse events/effects * ~<br>Mortality (all cause) * ~<br>Quality of Life * ~<br>Costs * ~                                                                                                                              | 7 (100%)<br>6 (86%)<br>7 (100%)<br>4 (58%)                                                        |
| MS & Rare Disease of the CNS (n=3)            | Adverse events/effects * ~<br>Clinical relapse<br>Disability progression *                                                                                                                                               | 3 (100%)<br>2 (67%)<br>2 (67%)                                                                    |
| Musculoskeletal (n=12)                        | Adverse events/effects * ~<br>Pain *<br>Fatigue                                                                                                                                                                          | 7 (54%)<br>10 (77%)<br>7 (54%)                                                                    |
| Neonatal (n=6)                                | Adverse events/effects<br>Mortality (all cause) *<br>Neurodevelopment * ~                                                                                                                                                | 4 (67%)<br>5 (71%)<br>4 (57%)                                                                     |
| Neuromuscular Disease (n=7)                   | Adverse events/effects * ~<br>Pain reduction ≥ 30%                                                                                                                                                                       | 7 (100%)<br>4 (57%)                                                                               |
| <i>Occupational Safety &amp; Health (n=4)</i> | Recurrence/relapse<br>Quality of Life (generic)<br>Functional status                                                                                                                                                     | 2 (50%)<br>2 (50%)<br>2 (50%)                                                                     |
| Oral Health (n=13)                            | Adverse events/effects * ~                                                                                                                                                                                               | 7 (50%)                                                                                           |
| Pain, Palliative & Supportive Care (n=24)     | Adverse events/effects * ~                                                                                                                                                                                               | 17 (71%)                                                                                          |
| Peripheral Vascular Disease (n=11)            | -                                                                                                                                                                                                                        | -                                                                                                 |
| Pregnancy & Childbirth (n=35)                 | Perinatal/neonatal mortality *                                                                                                                                                                                           | 28 (80%)                                                                                          |
| Prostatic & Urologic Cancers (n=2)            | <i>Only 2 reviews published in 2013, hence all outcomes are present in ≥50% of reviews.</i>                                                                                                                              |                                                                                                   |
| <i>Public Health (n=5)</i>                    | -                                                                                                                                                                                                                        | -                                                                                                 |
| Renal (n=8)                                   | Mortality (all cause) * ~                                                                                                                                                                                                | 6 (75%)                                                                                           |
| Schizophrenia (n=10)                          | Adverse events * ~<br>Mental state * ~<br>Social Functioning<br>Quality of Life (generic) * ~<br>General Functioning<br>Service utilisation * ~<br>Economic outcomes * ~<br>Withdrawals* ~<br>Satisfaction with care * ~ | 7 (70%)<br>9 (90%)<br>5 (50%)<br>5 (50%)<br>5 (50%)<br>10 (100%)<br>7 (70%)<br>7 (70%)<br>6 (60%) |
| Skin (n=7)                                    | Adverse effects * ~<br>Quality of Life *                                                                                                                                                                                 | 5 (72%)<br>5 (72%)                                                                                |
| Stroke (n=15)                                 | Adverse events/effects * ~                                                                                                                                                                                               | 11 (73%)                                                                                          |
| Tobacco Addiction (n=2)                       | <i>Only 2 reviews published in 2013, hence all outcomes are present in ≥50% of reviews.</i>                                                                                                                              |                                                                                                   |
| Upper GI & Pancreatic Diseases (n=8)          | Mortality (all cause) *                                                                                                                                                                                                  | 5 (56%)                                                                                           |
| Wounds (n=17)                                 | Adverse events/effects ~<br>Quality of Life (generic) * ~<br>Length of hospital stay *                                                                                                                                   | 15 (88%)<br>12 (71%)<br>11 (65%)                                                                  |

\* Categories of outcomes that were also specified in ≥50% of reviews published in 2007

~ Categories of outcomes that were also specified in ≥50% of reviews published in 2011

Cochrane Review Group in *italics* were not present in the initial survey (2007 and 2011), hence no comparison could be made.
